# Supplementary material
Source: Springer Nature journal article supplement (https://www.springermedizin.de/resource/supplementary/12885_2009_2150_MOESM14_ESM.pdf/9460632)

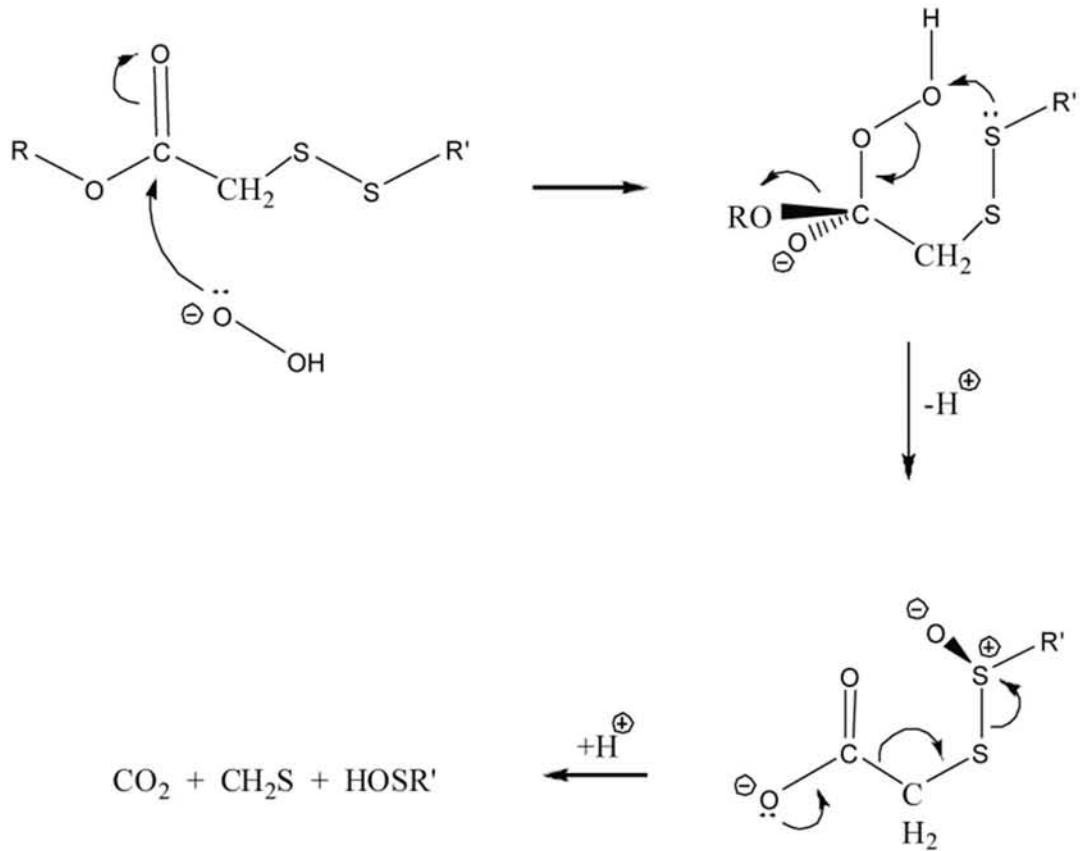

Supplement: MOESM14 [file 9460632]
